# Supplementary material for: Impact of point-of-care panel tests in ambulatory care: a systematic review and meta-analysis
Source: PubMed Central journal article supplement (PMC7050348; doi:10.1136/bmjopen-2019-032132), 2020-02-27

**Appendix 1: Search Strategy**

- 1 Ambulatory Care/
- 2 exp Ambulatory Care Facilities/
- 3 general practice/ or family practice/
- 4 general practitioners/ or physicians, family/ or physicians, primary care/
- 5 Primary Health Care/
- 6 Office Visits/
- 7 exp Emergency Service, Hospital/
- 8 Emergency Medical Services/
- 9 (ambulatory adj3 (care or setting? or facilit\* or ward? or department? or service?)).ti,ab.
- 10 ((general or family) adj2 (practi\* or physician? or doctor?)).ti,ab.
- 11 (primary care or primary health care or primary healthcare).ti,ab.
- 12 (emergency adj3 (care or setting? or facilit\* or ward? or department? or service?)).ti,ab.
- 13 (after hour? or afterhour? or "out of hour?" or ooh).ti,ab.
- 14 (clinic? or visit?).ti,ab.
- 15 ((health\* or medical) adj2 (center? or centre?)).ti,ab.
- 16 community health services/ or exp community health nursing/
- 17 Community Health Workers/
- 18 (community adj2 (health or health care or service? or program\*)).ti,ab.
- 19 (community adj2 (worker? or aide? or volunteer? or assistant? or visitor?)).ti,ab.
- 20 ((lay or volunteer) adj2 (health worker? or health aide? or health assistant?)).ti,ab.
- 21 ((health\* or medical) adj2 (facility or facilities)).ti,ab.
- 22 1 or 2 or 3 or 4 or 5 or 6 or 7 or 8 or 9 or 10 or 11 or 12 or 13 or 14 or 15
- 23 16 or 17 or 18 or 19 or 20 or 21
- 24 Point-of-Care Systems/
- 25 ("point of care" or POC) adj3 (test\* or diagnos\*).ti,ab.
- 26 ("point of care" or POC) and (test\* or diagnos\*).ti.

- 27 poct.ti,ab.
- 28 ((rapid or bedside or bed-side or "near patient") adj3 (test\* or diagnos\*)).ti,ab.
- 29 ((rapid or bedside or bed-side or "near patient") and (test\* or diagnos\*)).ti.
- 30 24 or 25 or 26 or 27 or 28 or 29
- 31 (istat or i-stat or afinion).ti,ab.
- 32 30 or 31
- 33 22 and 32
- 34 23 and 32
- 35 34 not 33

Appendix 2: Risk of bias assessment for Parvin et al, before-after study<sup>27</sup>

| Selection                  |                                                                   | Performance                         | Detection                      | Attrition               | Reporting           | Other                                                                                                               | Pre-specified confounders         |                                                                     |                                                                                               |
|----------------------------|-------------------------------------------------------------------|-------------------------------------|--------------------------------|-------------------------|---------------------|---------------------------------------------------------------------------------------------------------------------|-----------------------------------|---------------------------------------------------------------------|-----------------------------------------------------------------------------------------------|
| Random sequence generation | Allocation concealment                                            | Blinding of participants/ personnel | Blinding of outcome assessment | Incomplete outcome data | Selective reporting |                                                                                                                     | Baseline characteristics reported | Baseline characteristics similar in intervention and control groups | Detailed description of usual care pathway                                                    |
| not randomised             | not concealed; time periods of intervention and control described | none                                | not described                  | not described           | not described       | control groups from before and after the intervention period; retrospective designation of presenting symptom codes | not reported                      | not reported                                                        | no details other than that samples are sent to central laboratory via vacuum transport system |
| <b>HIGH RISK</b>           | <b>HIGH RISK</b>                                                  | <b>HIGH RISK</b>                    | <b>UNCLEAR RISK</b>            | <b>UNCLEAR RISK</b>     | <b>UNCLEAR RISK</b> | <b>HIGH RISK</b>                                                                                                    | <b>HIGH RISK</b>                  | <b>HIGH RISK</b>                                                    | <b>HIGH RISK</b>                                                                              |

## Appendix 3

## Sensitivity Analysis

Figure 3: Disposition Decision (subgroups for patients who needed laboratory tests in addition to POCT)

Figure 3a) With Illahi<sup>25</sup>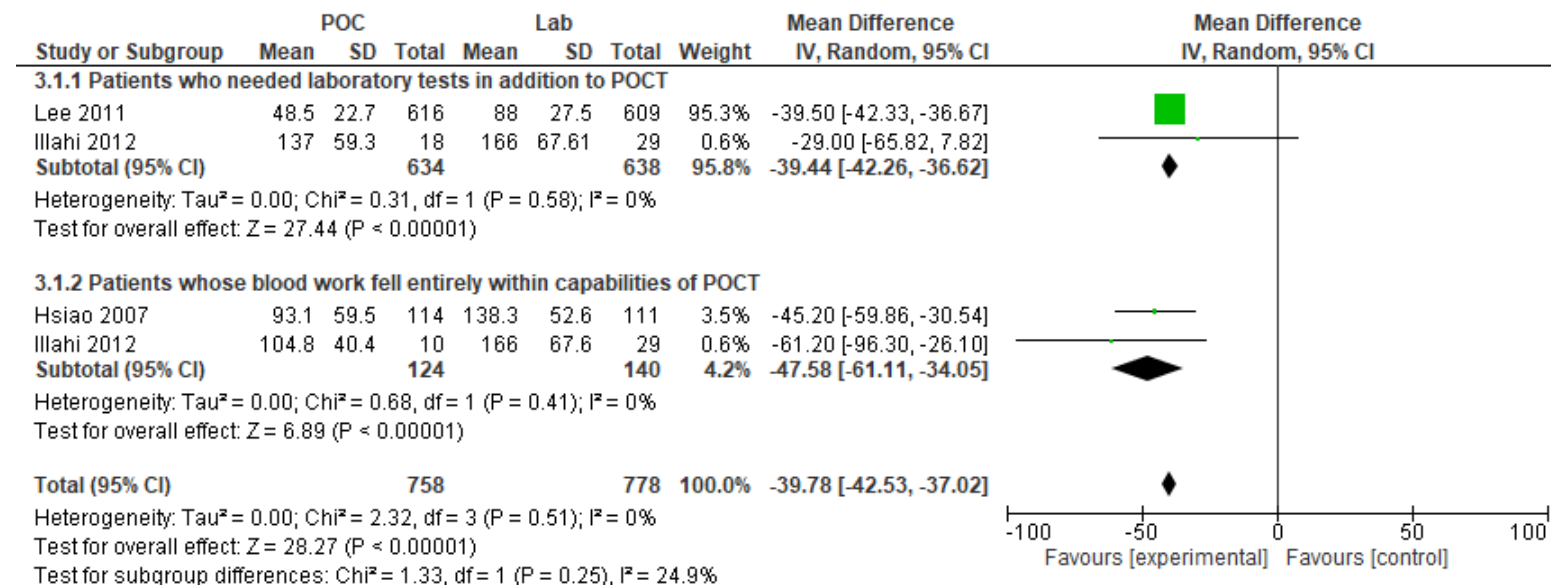

Figure 3b) Without Illahi<sup>25</sup>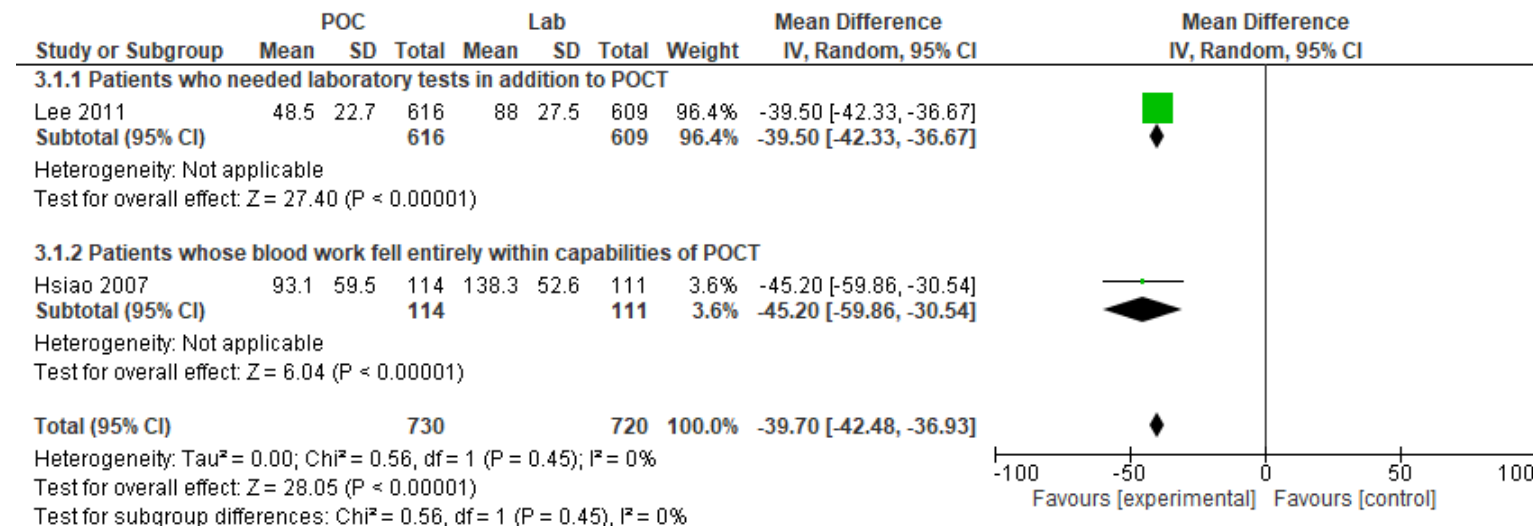

Supplement: bmjopen-2019-032132supp001.pdf [file bmjopen-2019-032132supp001.pdf]
